# Supplementary material
Source: PubMed Central journal article supplement (PMC5442552)

## Supplemental Table and Figures

**Supplemental Table 1. SNP-Based Analysis Minnesota Burn Unit Outbreak**

|             | C2012025220 | C2012025221 | C2012025222 | C2012025223 | C2012025225 | C2012025226 | C2012025228 | C2012026544 | C2012026546 | C2012026547 | C2012026548 | C2012026549 | C2012027345 | C2012027346 | C2012027348 | C2012027350 | USA300 | USA500 |
|-------------|-------------|-------------|-------------|-------------|-------------|-------------|-------------|-------------|-------------|-------------|-------------|-------------|-------------|-------------|-------------|-------------|--------|--------|
| C2012025220 | 0           | 12          | 11          | 24          | 17          | 16          | 15          | 11          | 154         | 8           | 0           | 5           | 20          | 24          | 22          | 4           | 77     | 2397   |
| C2012025221 | 12          | 0           | 3           | 16          | 5           | 5           | 2           | 3           | 154         | 12          | 12          | 14          | 16          | 16          | 14          | 11          | 82     | 2397   |
| C2012025222 | 11          | 3           | 0           | 15          | 4           | 4           | 1           | 2           | 153         | 12          | 12          | 13          | 16          | 15          | 13          | 10          | 81     | 2396   |
| C2012025223 | 24          | 16          | 15          | 0           | 15          | 15          | 14          | 15          | 158         | 18          | 18          | 20          | 0           | 4           | 2           | 18          | 86     | 2401   |
| C2012025225 | 17          | 5           | 4           | 15          | 0           | 0           | 3           | 4           | 153         | 11          | 11          | 13          | 15          | 15          | 13          | 11          | 81     | 2396   |
| C2012025226 | 16          | 5           | 4           | 15          | 0           | 0           | 3           | 4           | 152         | 11          | 11          | 13          | 15          | 15          | 13          | 11          | 80     | 2395   |
| C2012025228 | 15          | 2           | 1           | 14          | 3           | 3           | 0           | 1           | 146         | 10          | 10          | 10          | 14          | 14          | 12          | 10          | 74     | 2388   |
| C2012026544 | 11          | 3           | 2           | 15          | 4           | 4           | 1           | 0           | 153         | 11          | 11          | 13          | 15          | 15          | 13          | 10          | 81     | 2396   |
| C2012026546 | 154         | 154         | 153         | 158         | 153         | 152         | 146         | 153         | 0           | 155         | 154         | 149         | 159         | 159         | 158         | 135         | 104    | 2416   |
| C2012026547 | 8           | 12          | 12          | 18          | 11          | 11          | 10          | 11          | 155         | 0           | 2           | 3           | 18          | 18          | 16          | 5           | 83     | 2398   |
| C2012026548 | 0           | 12          | 12          | 18          | 11          | 11          | 10          | 11          | 154         | 2           | 0           | 4           | 18          | 18          | 16          | 4           | 83     | 2397   |
| C2012026549 | 5           | 14          | 13          | 20          | 13          | 13          | 10          | 13          | 149         | 3           | 4           | 0           | 20          | 18          | 18          | 3           | 76     | 2391   |
| C2012027345 | 20          | 16          | 16          | 0           | 15          | 15          | 14          | 15          | 159         | 18          | 18          | 20          | 0           | 4           | 2           | 17          | 87     | 2402   |
| C2012027346 | 24          | 16          | 15          | 4           | 15          | 15          | 14          | 15          | 159         | 18          | 18          | 18          | 4           | 0           | 2           | 18          | 83     | 2402   |
| C2012027348 | 22          | 14          | 13          | 2           | 13          | 13          | 12          | 13          | 158         | 16          | 16          | 18          | 2           | 2           | 0           | 16          | 86     | 2401   |
| C2012027350 | 4           | 11          | 10          | 18          | 11          | 11          | 10          | 10          | 135         | 5           | 4           | 3           | 17          | 18          | 16          | 0           | 62     | 2378   |
| USA300      | 77          | 82          | 81          | 86          | 81          | 80          | 74          | 81          | 104         | 83          | 83          | 76          | 87          | 83          | 86          | 62          | 0      | 2335   |
| USA500      | 2397        | 2397        | 2396        | 2401        | 2396        | 2395        | 2388        | 2396        | 2416        | 2398        | 2397        | 2391        | 2402        | 2402        | 2401        | 2378        | 2335   | 0      |

Green = 'Indistinguishable'; Yellow = 'Closely Related'; Orange = 'Possibly Closely Related'; Red = 'Different'

**Supplemental Table 2. SNP-Based Analysis of Post-Surgical Unit Outbreak**

|             | C2014000754 | C2014000755 | C2014000756 | C2014000759 | C2014006915 | C2014006916 | C2014006917 | C2014006918 | C2014006919 | C2014006920 | C2014006921 | C2014006943 | USA100 | USA300 | USA500 | USA800 |
|-------------|-------------|-------------|-------------|-------------|-------------|-------------|-------------|-------------|-------------|-------------|-------------|-------------|--------|--------|--------|--------|
| C2014000754 | 0           | 43          | 46          | 23          | 2014        | 18214       | 1298        | 18252       | 2354        | 1816        | 18234       | 18231       | 1183   | 18156  | 19244  | 1494   |
| C2014000755 | 43          | 0           | 29          | 37          | 1953        | 17200       | 1240        | 17238       | 2296        | 1757        | 17218       | 17215       | 1107   | 17144  | 18254  | 1436   |
| C2014000756 | 46          | 29          | 0           | 39          | 2074        | 19131       | 1355        | 19167       | 2415        | 1864        | 19152       | 19149       | 1254   | 19074  | 20120  | 1497   |
| C2014000759 | 23          | 37          | 39          | 0           | 1985        | 17585       | 1252        | 17621       | 2352        | 1798        | 17606       | 17603       | 1141   | 17527  | 18639  | 1534   |
| C2014006915 | 2014        | 1953        | 2074        | 1985        | 0           | 18260       | 938         | 18295       | 29          | 1126        | 18275       | 18274       | 1091   | 18203  | 18630  | 2312   |
| C2014006916 | 18214       | 17200       | 19131       | 17585       | 18260       | 0           | 10528       | 162         | 20753       | 19056       | 129         | 133         | 14673  | 69     | 2378   | 20371  |
| C2014006917 | 1298        | 1240        | 1355        | 1252        | 938         | 10528       | 0           | 10568       | 1183        | 42          | 10543       | 10542       | 462    | 10471  | 11502  | 1708   |
| C2014006918 | 18252       | 17238       | 19167       | 17621       | 18295       | 162         | 10568       | 0           | 20788       | 19093       | 183         | 187         | 14713  | 121    | 2417   | 20406  |
| C2014006919 | 2354        | 2296        | 2415        | 2352        | 29          | 20753       | 1183        | 20788       | 0           | 1303        | 20770       | 20769       | 1349   | 20697  | 21001  | 2418   |
| C2014006920 | 1816        | 1757        | 1864        | 1798        | 1126        | 19056       | 42          | 19093       | 1303        | 0           | 19074       | 19073       | 819    | 18999  | 19626  | 1998   |
| C2014006921 | 18234       | 17218       | 19152       | 17606       | 18275       | 129         | 10543       | 183         | 20770       | 19074       | 0           | 3           | 14690  | 83     | 2398   | 20392  |
| C2014006943 | 18231       | 17215       | 19149       | 17603       | 18274       | 133         | 10542       | 187         | 20769       | 19073       | 3           | 0           | 14687  | 83     | 2403   | 20389  |
| USA100      | 1183        | 1107        | 1254        | 1141        | 1091        | 14673       | 462         | 14713       | 1349        | 819         | 14690       | 14687       | 0      | 14613  | 15833  | 1367   |
| USA300      | 18156       | 17144       | 19074       | 17527       | 18203       | 69          | 10471       | 121         | 20697       | 18999       | 83          | 83          | 14613  | 0      | 2335   | 20314  |
| USA500      | 19244       | 18254       | 20120       | 18639       | 18630       | 2378        | 11502       | 2417        | 21001       | 19626       | 2398        | 2403        | 15833  | 2335   | 0      | 21448  |
| USA800      | 1494        | 1436        | 1497        | 1534        | 2312        | 20371       | 1708        | 20406       | 2418        | 1998        | 20392       | 20389       | 1367   | 20314  | 21448  | 0      |

Green = 'Indistinguishable'; Yellow = 'Closely Related'; Orange = 'Possibly Closely Related'; Pink = 'Possibly Different' Red = 'Different'

**Supplemental Table 3. SNP-Based Analysis of Connecticut Football Team Outbreak**

|             | C2003002989 | C2003002990 | C2003002991 | C2003002993 | C2003002995 | C2003002997 | C2003003365 | C2003003366 | C2003003367 | C2003003368 | C2003003369 | C2003003370 | USA300 | USA500 |
|-------------|-------------|-------------|-------------|-------------|-------------|-------------|-------------|-------------|-------------|-------------|-------------|-------------|--------|--------|
| C2003002989 | 0           | 4           | 3           | 6           | 4           | 6           | 10          | 5           | 4           | 4           | 4           | 4           | 69     | 2368   |
| C2003002990 | 4           | 0           | 5           | 2           | 4           | 2           | 6           | 1           | 0           | 0           | 0           | 0           | 66     | 2365   |
| C2003002991 | 3           | 5           | 0           | 8           | 5           | 7           | 5           | 6           | 5           | 5           | 5           | 5           | 70     | 2370   |
| C2003002993 | 6           | 2           | 8           | 0           | 6           | 4           | 2           | 3           | 2           | 2           | 3           | 2           | 74     | 2372   |
| C2003002995 | 4           | 4           | 5           | 6           | 0           | 6           | 10          | 5           | 4           | 4           | 4           | 4           | 70     | 2369   |
| C2003002997 | 6           | 2           | 7           | 4           | 6           | 0           | 2           | 3           | 2           | 2           | 2           | 2           | 72     | 2371   |
| C2003003365 | 10          | 6           | 5           | 2           | 10          | 2           | 0           | 7           | 0           | 0           | 0           | 6           | 64     | 2369   |
| C2003003366 | 5           | 1           | 6           | 3           | 5           | 3           | 7           | 0           | 1           | 1           | 1           | 1           | 68     | 2365   |
| C2003003367 | 4           | 0           | 5           | 2           | 4           | 2           | 0           | 1           | 0           | 0           | 0           | 0           | 63     | 2365   |
| C2003003368 | 4           | 0           | 5           | 2           | 4           | 2           | 0           | 1           | 0           | 0           | 0           | 0           | 68     | 2367   |
| C2003003369 | 4           | 0           | 5           | 3           | 4           | 2           | 0           | 1           | 0           | 0           | 0           | 0           | 62     | 2361   |
| C2003003370 | 4           | 0           | 5           | 2           | 4           | 2           | 6           | 1           | 0           | 0           | 0           | 0           | 71     | 2369   |
| USA300      | 69          | 66          | 70          | 74          | 70          | 72          | 64          | 68          | 63          | 68          | 62          | 71          | 0      | 2335   |
| USA500      | 2368        | 2365        | 2370        | 2372        | 2369        | 2371        | 2369        | 2365        | 2365        | 2367        | 2361        | 2369        | 2335   | 0      |

Green = 'Indistinguishable'; Yellow = 'Closely Related'; Orange = 'Possibly Closely Related'; Red = 'Different'

Supplemental Figure 1. Connecticut Football Team Outbreak - Long Mate Pair and Paired-End Assembly Minimum Spanning Tree

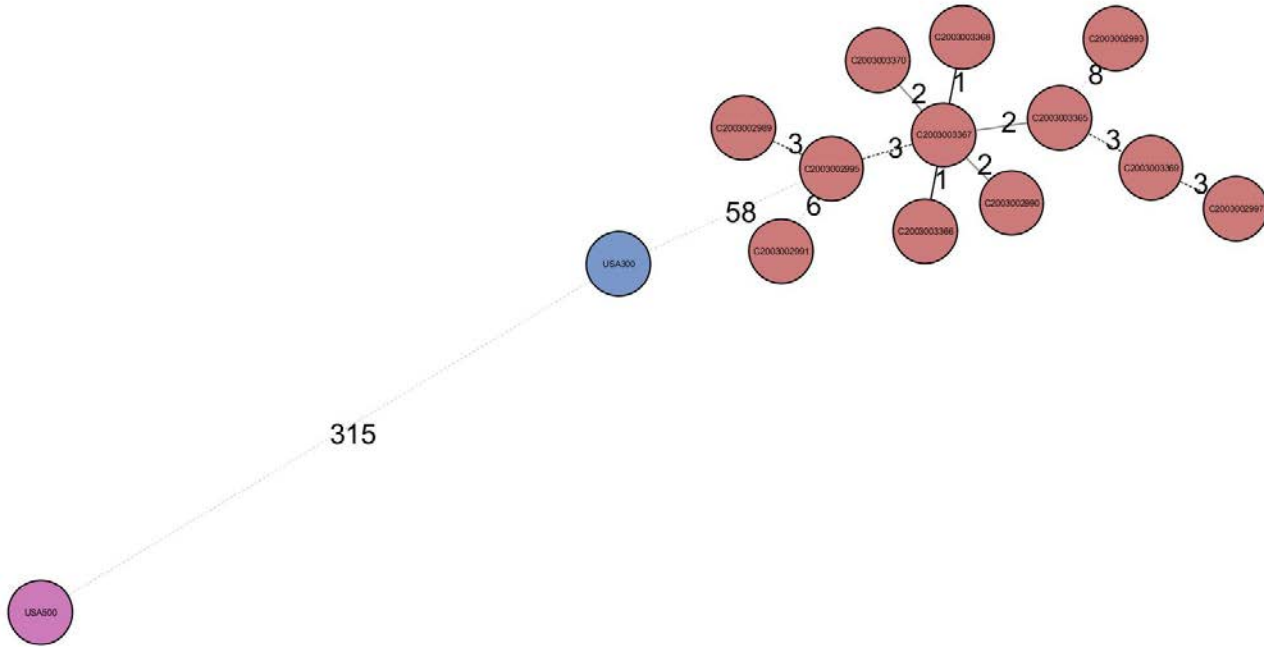

Supplemental Figure 2. Minnesota Burn Unit Outbreak - Long Mate Pair and Paired-End Assembly Minimum Spanning Tree

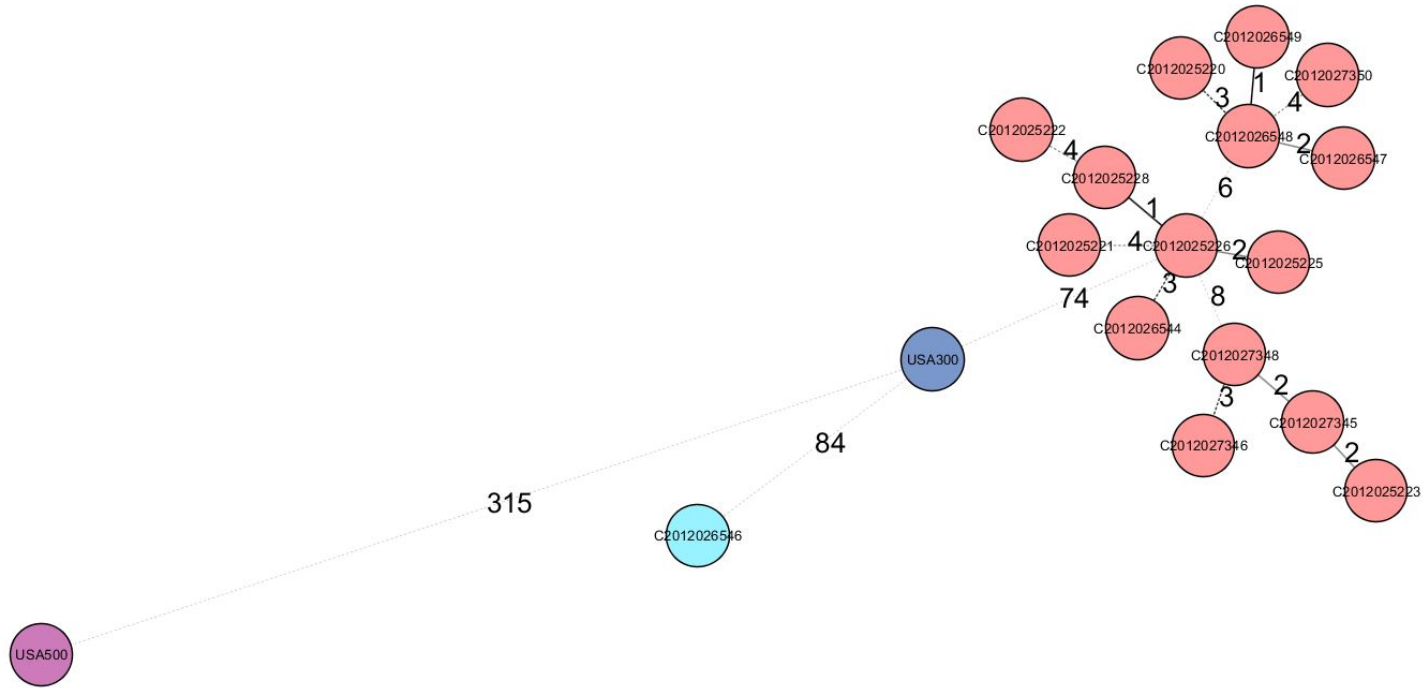

Supplemental Figure 3. Post-Surgical Unit Outbreak - Long Mate Pair and Paired-End Assembly Minimum Spanning Tree

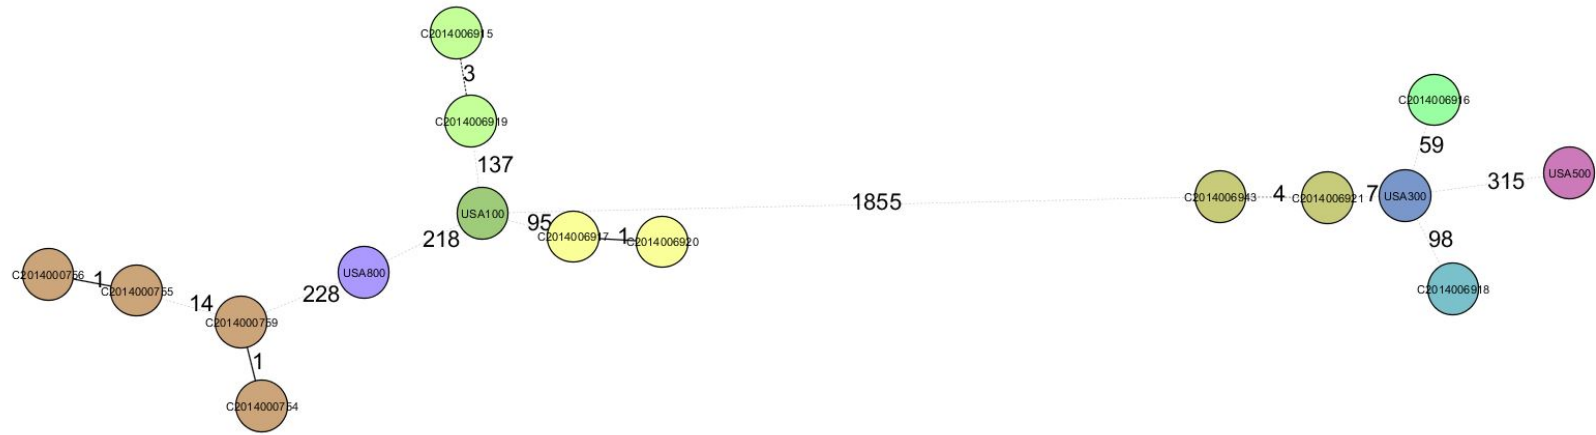







Supplemental Figure 6. Post-Surgical Unit Outbreak - Paired-End Assembly Minimum Spanning Tree

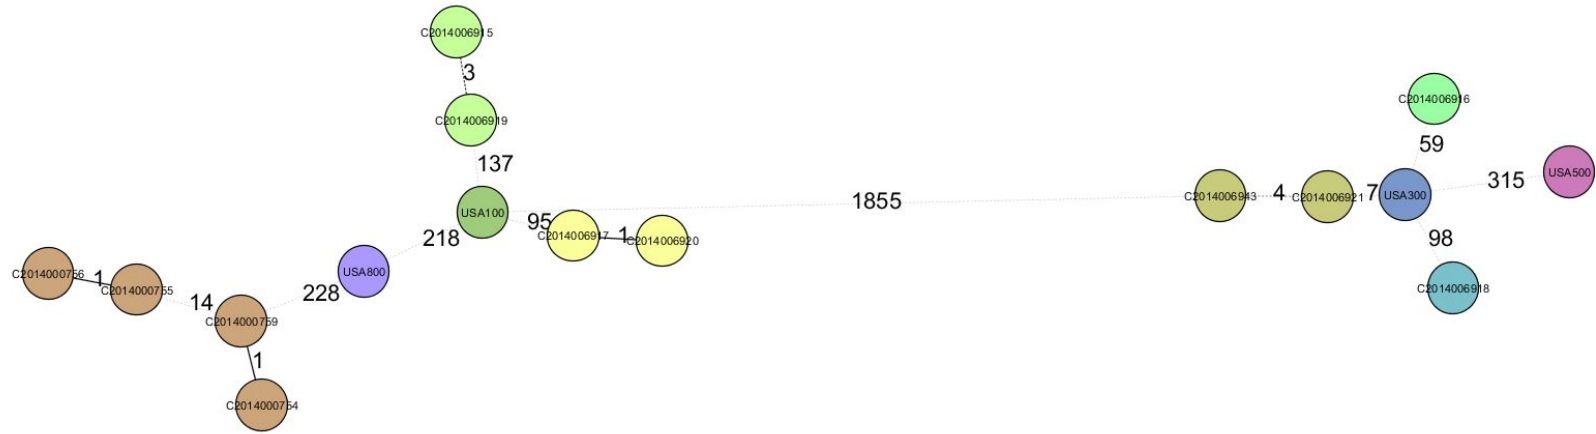

Supplement: JCM.00029-17_zjm999095536s1.pdf [file JCM.00029-17_zjm999095536s1.pdf]
